# Supplementary material for: In-silico , evolutionary, and functional analysis of CHUP1 and its related proteins in Bienertia sinuspersici —a comparative study across C 3 , C 4 , CAM, and SCC 4 model plants
Source: PeerJ journal article supplement (doi:10.7717/peerj.15696), 2023-07-11
Supplement: Fig7CRawData.xlsx [file Fig7CRawData.xlsx]

## Sheet: ChuP1nCOP1_dCt
CHUP1-like_b									1/2^SCq-TCq			Avg	SE
Stage				Stage	Bs_GAPDH
Y	26.438	26.389	26.385	Y	20.374	20.202	20.265	0.014947	0.0137255	0.0143779	Young	0.0143501	0.000352898
I	28.154	28.17	28.31	I	21.219	21.243	21.023	0.00817254	0.00821798	0.00640316	Intermediate	0.00759789	0.000597511		CHUP1-like_b
M	31.859	31.699	31.42	M	21.451	21.574	21.536	0.000736003	0.000895512	0.00105833	Mature	0.000896614	9.30482e-05
CHUP1
Stage				Stage	Bs_GAPDH							Avg	SE
Y	19.954	19.883	19.693	Y	20.374	20.202	20.265	1.33793	1.24747	1.48658	Young	1.35733	0.0697053
I	21.52	21.455	21.459	I	21.219	21.243	21.023	0.81169	0.86334	0.739181	Intermediate	0.804737	0.0360096		CHUP1
M	22.073	22.061	22.002	M	21.451	21.574	21.536	0.64977	0.713507	0.723969	Mature	0.695749	0.0231871
TPR									1/2^SCq-TCq			Avg	SE
Stage				Stage	Bs_GAPDH
Y	24.815	24.712	24.604	Y	20.374	20.202	20.265	0.046039	0.0438889	0.0494118	Young	0.0464466	0.0016073
I	26.923	27.017	27.492	I	21.219	21.243	21.023	0.0191834	0.0182748	0.0112885	Intermediate	0.0162489	0.00249402		TPR
M	29.761	29.266	29.42	M	21.451	21.574	21.536	0.00315094	0.0048359	0.0042333	Mature	0.00407338	0.000492933
CHUP1-like_a									1/2^SCq-TCq			Avg	SE
Stage				Stage	Bs_GAPDH
Y	26.518	26.408	26.401	Y	20.374	20.202	20.265	0.0141407	0.0135459	0.0142194	Young	0.0139687	0.000212596
I	29.161	28.911	29.106	I	21.219	21.243	21.023	0.00406649	0.00491702	0.00368786	Intermediate	0.00422379	0.00036344		CHUP1-like_a
M	31.303	31.848	31.597	M	21.451	21.574	21.536	0.00108206	0.00080764	0.000936132	Mature	0.000941945	7.92723e-05
ABP
Stage				Stage	Bs_GAPDH							Avg	SE
Y	25.502	25.419	25.408	Y	20.374	20.202	20.265	0.0285968	0.026886	0.0283011	Young	0.027928	0.000527929
I	26.829	26.957	26.944	I	21.219	21.243	21.023	0.0204749	0.0190509	0.0165045	Intermediate	0.0186767	0.00116133		ABP
M	27.783	27.429	27.47	M	21.451	21.574	21.536	0.012413	0.017277	0.0163564	Mature	0.0153488	0.00149176
Bs_GAPDH			Rep 1
Young	20.374	20.202	20.265
Intermediate	21.219	21.243	21.023
Mature	21.451	21.574	21.536
			Rep 2
Young	20.351	19.85	19.87
Intermediate	20.701	20.669	21.179
Mature	21.383	21.3	21.209
	Rep1	Rep2
Young	20.2803	20.0237
Intermediate	21.1617	20.8497
Mature	21.5203	21.2973
